# Supplementary material
Source: Research Square preprint supplement (doi:10.21203/rs.3.rs-9964544/v1)
Supplement: Supplementary file 1 [file d1e84b10cb82b45ec39ba2d2.docx]

**SUPPORTING INFORMATION**

**Phytochemical profiling, antioxidant and anti-inflammatory activities of four West African spices incorporated as bioactive ingredients for dermatological formulations**

**Estelle Y. Poungam**a, **Messie M. Muipata**a,b, **Isaac E. Kaba**c,*, **Carmel G. Kandhe**d, **Jeancy M. Boy**a,e, **Jonathan M. Mukanya**a,e,f, **Paulin K. Mutwale**a,e, **and** **Nadège K. Ngombe**a,e,*

a*Centre d’Etudes des Substances Naturelles d’Origine Végétale (CESNOV), Faculty of Pharmaceutical Sciences, University of Kinshasa, B.P. 212, Kinshasa XI, Democratic Republic of Congo*

*bUFR des Sciences Pharmaceutiques et Biologiques, Nantes Université, BP 61112, 44035 Nantes Cedex, France*

c *Department of Chemistry, College of Chemistry, University of California, Berkeley, CA 94720, United States*

d*Department of Epidemiology and Biostatistics, Arnold School of Public Health, University of South Carolina, Columbia, SC 29208, United States*

*eCentre de Recherche en Nanotechnologies Appliquées aux Produits Naturels (CReNAPN), Faculty of Pharmaceutical Sciences, University of Kinshasa, B.P. 212, Kinshasa XI, Democratic Republic of Congo*

*f Center for Chemico and Bio-Medicinal Research (CCBR), Department of Chemistry, Faculty of Sciences, Rhodes University, PO Box 94, Grahamstown, Eastern Cape, South Africa*

***Corresponding author:**

Nadège Kabamba Ngombe ([nadegengk@unikin.ac.cd](mailto:nadegengk@unikin.ac.cd)); CESNOV and CReNAPN, Faculty of Pharmaceutical Sciences, University of Kinshasa, B.P. 212, Kinshasa XI, Democratic Republic of Congo.

**CONTENTS**

**TABLES**

**Table S1.** Mass (g) of all 40 formulated soap bars

**Table S2.** Foaming power across all water types and extract types

**FIGURES**

**Figures S1–S8.** Full micrographic characterization panels for all four species

**Figure S9-12.** Foaming power photographs for all four species

**TABLES**

**Table S1.** Mass (g) of formulated soap bars (n = 5 per formulation)

| **Extract type** | **n** | *X. aethiopica* | *T. tetraptera* | *M. myristica* | *R. heudelotii* |
| --- | --- | --- | --- | --- | --- |
| Powder extract | 5 | 110 | 110 | 106 | 106 |
| Aqueous macerate | 5 | 106 | 106 | 110 | 110 |

**Table S2.** Foaming power (cm) of all soap formulations. P: powder extract; L: aqueous macerate; d: distilled; D: demineralized; M: mineral; F: tap water

| **Species** | | **Ext.** | | **Type** | | **Pd** | | **PD** | | **PM** | | **PF** | | **Ld** | | **LD** | | **LM** | |
| --- | --- | --- | --- | --- | --- | --- | --- | --- | --- | --- | --- | --- | --- | --- | --- | --- | --- | --- | --- |
| **Species** | **Type** | | **Pd** | | **PD** | | **PM** | | **PF** | | **Ld** | | **LD** | | **LM** | | **LF** | |
| *Xylopia aethiopica* | P+L | | 2.0 | | 2.5 | | 0.5 | | 3.0 | | 2.2 | | 3.0 | | 2.0 | | 4.0 | |
| *Tetrapleura tetraptera* | P+L | | 4.0 | | 2.0 | | 1.5 | | 4.0 | | 2.5 | | 2.5 | | 2.0 | | 2.5 | |
| *Monodora myristica* | P+L | | 1.0 | | 4.0 | | 4.0 | | 5.0 | | 4.0 | | 4.0 | | 2.0 | | 4.0 | |
| *Ricinodendron heudelotii* | P+L | | 1.7 | | 2.5 | | 1.0 | | 3.0 | | 0.6 | | 3.0 | | 2.0 | | 3.0 | |

P: powder extract soap; L: aqueous macerate soap. d: distilled; D: demineralized; M: mineral; F: tap water.

**FIGURES**

**Figures S1–S8. Micrographic characterization (10× and 40× magnification)**


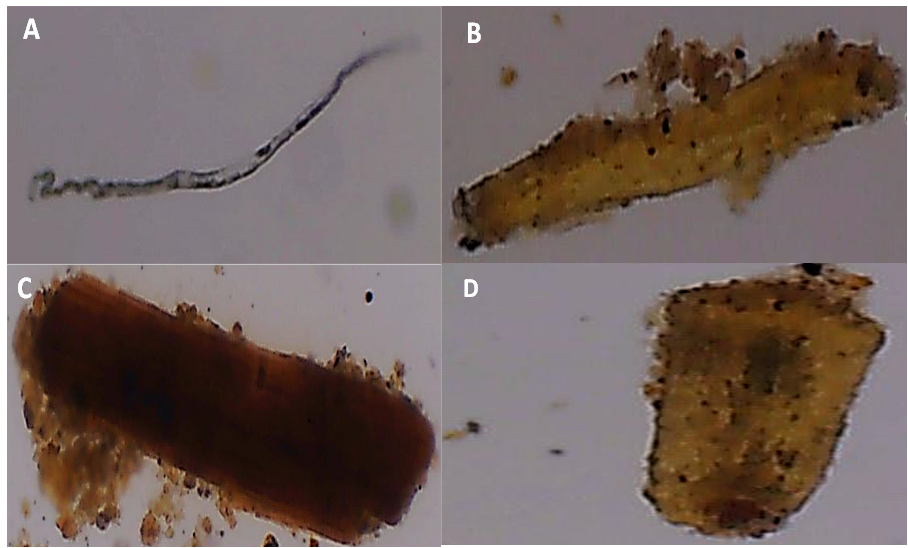


**Figure S1.** *Xylopia aethiopica* fruit powder: (A) fiber fragment; (B, C, D) tannin cells.


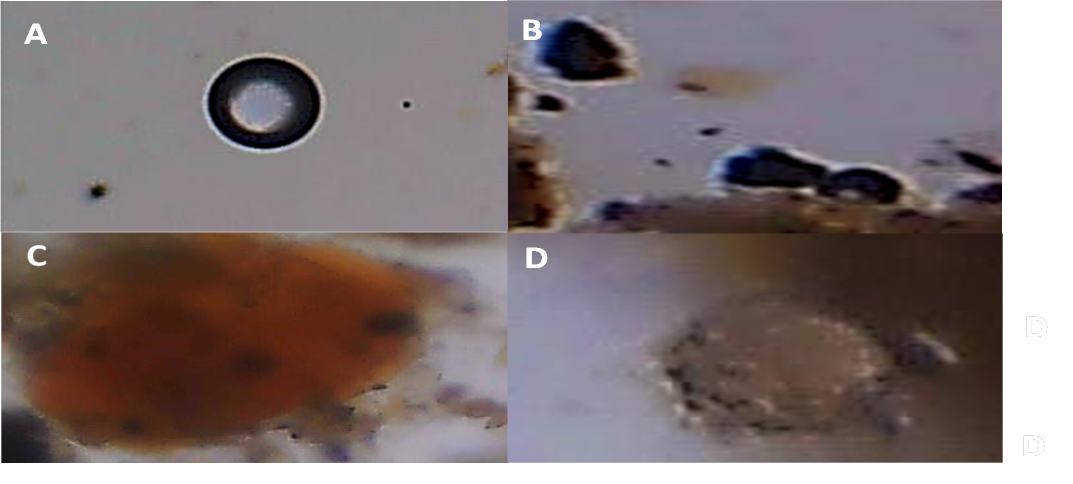


**Figure S2.** *Xylopia aethiopica* fruit powder: (A, B) starch grains; (C) uncharacterized orange-colored droplets; (D) oil droplets.


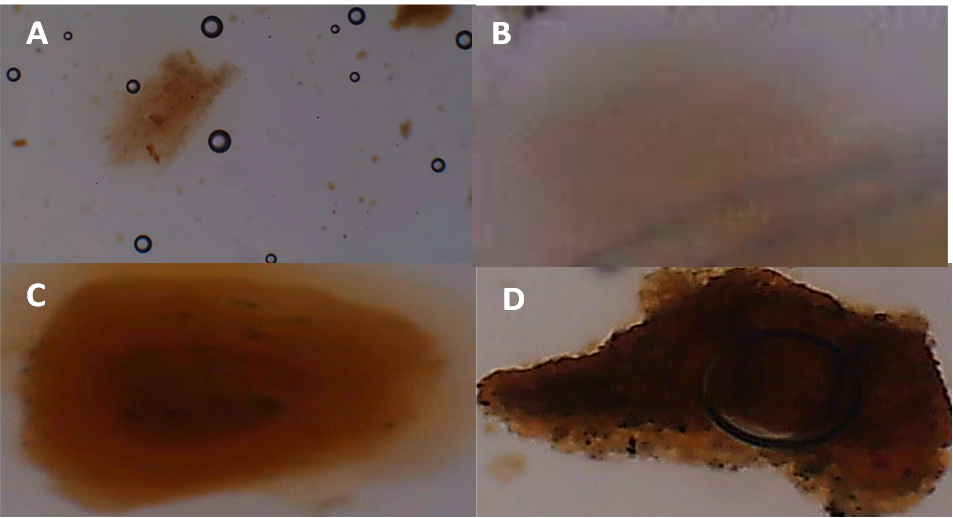


**Figure S3.** *Tetrapleura tetraptera* fruit powder: (A) starch grains; (B) oil droplet; (C, D) elements to be determined.


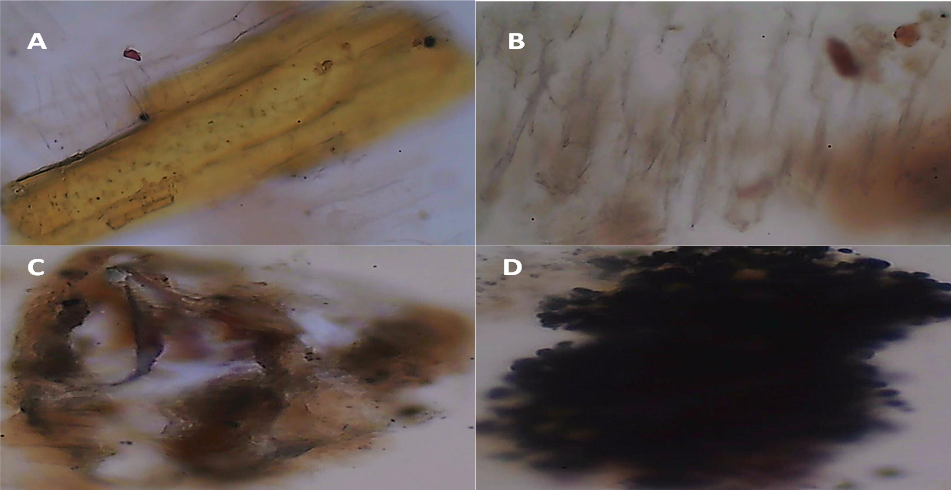


**Figure S4***. Tetrapleura tetraptera* fruit powder: (A) fibre bundle; (B) striated fibre fragment; (C, D) clustered starch grains.


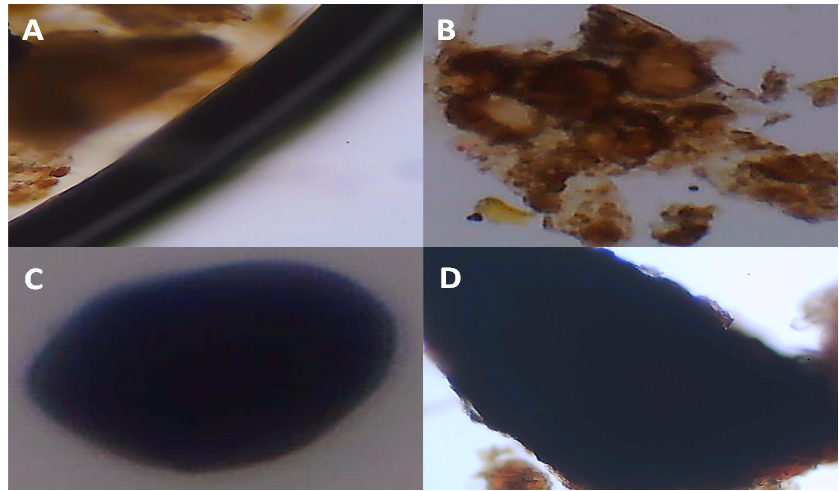


**Figure S5.** *Monodora myristica* fruit powder: (A, B) elements to be determined; (C, D) spherical starch grains.


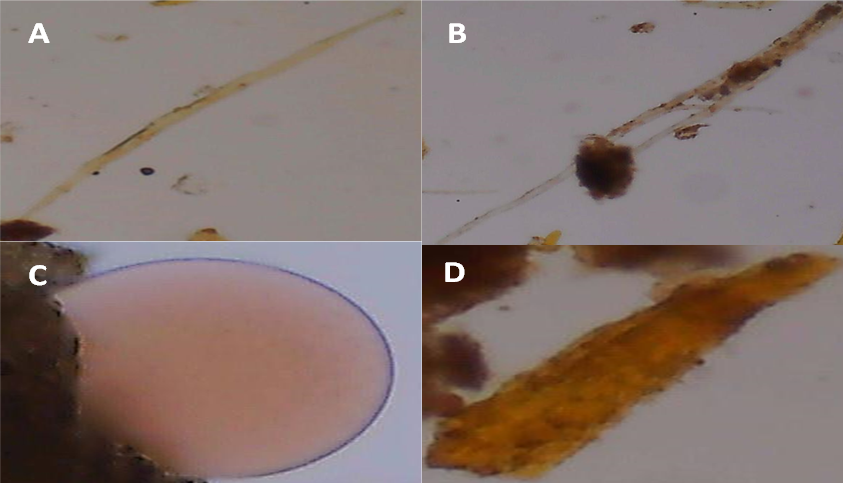


**Figure S6.** *Monodora myristica* fruit powder: (A, B) trichomes; (C) oil droplet; (D) fibre fragment.


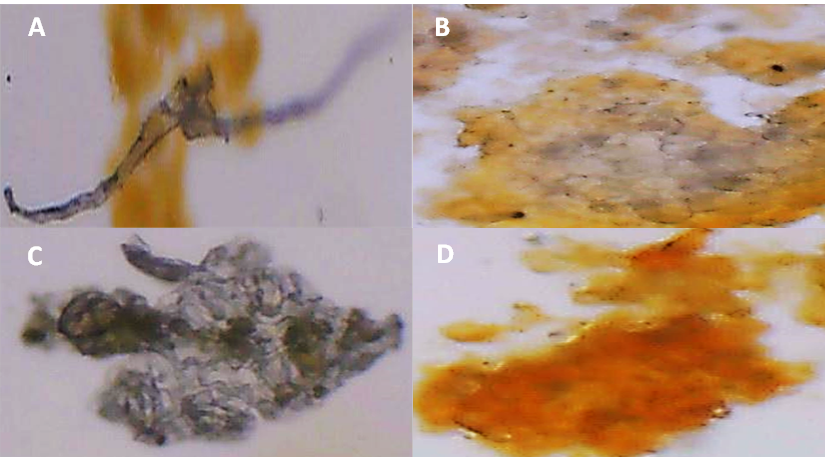


**Figure S7***. Ricinodendron heudelotii* fruit powder: (A) trichome-like fibre; (B) starch grain aggregate; (C) urchin-like calcium oxalate crystal cluster; (D) element to be determined.


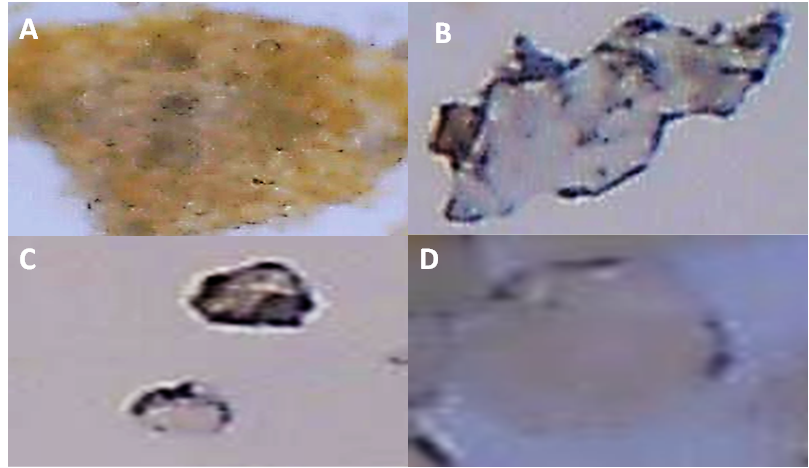


**Figure S8.** *Ricinodendron heudelotii* fruit powder: (A) starch grain aggregate; (B) urchin-like crystal; (C) oil droplet; (D) element to be determined.

**Figures S19–S12. Foaming power photos**


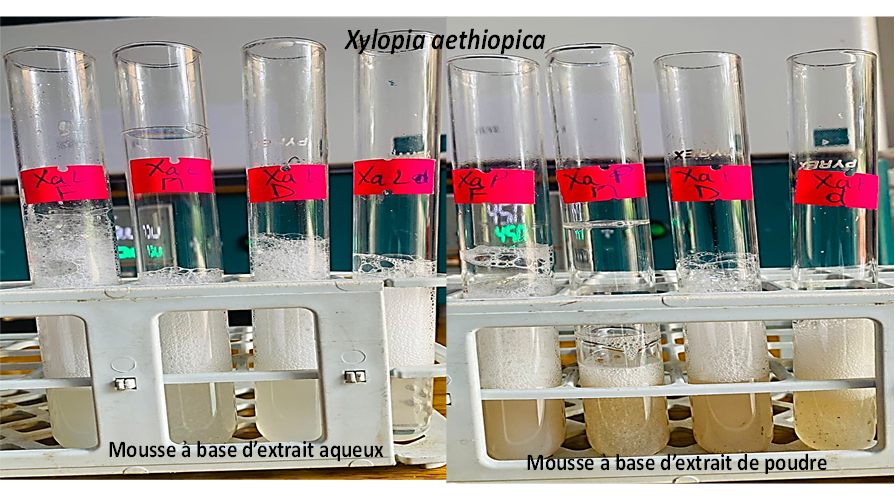


**Figure S9.**Foaming power of *Xylopia aethiopica* soaps across four water types.


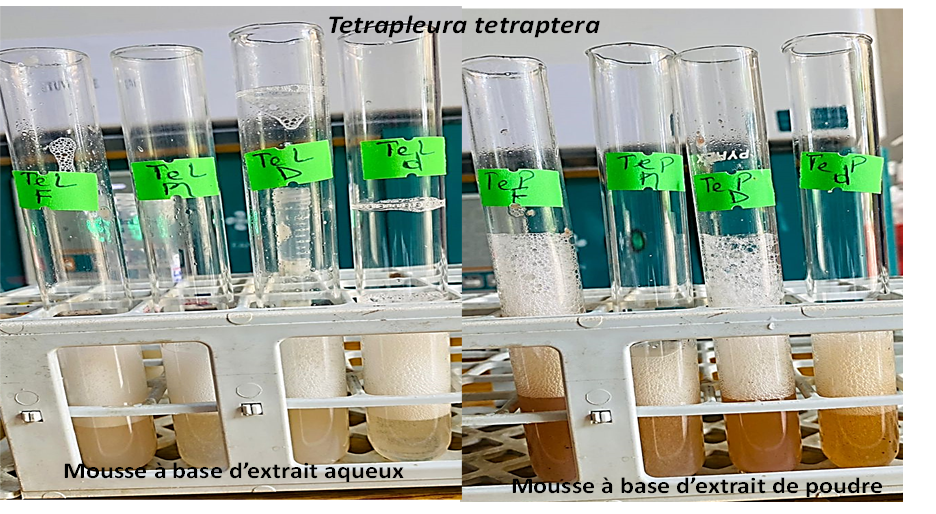


**Figure S10.**Foaming power of *Tetrapleura tetraptera* soaps.


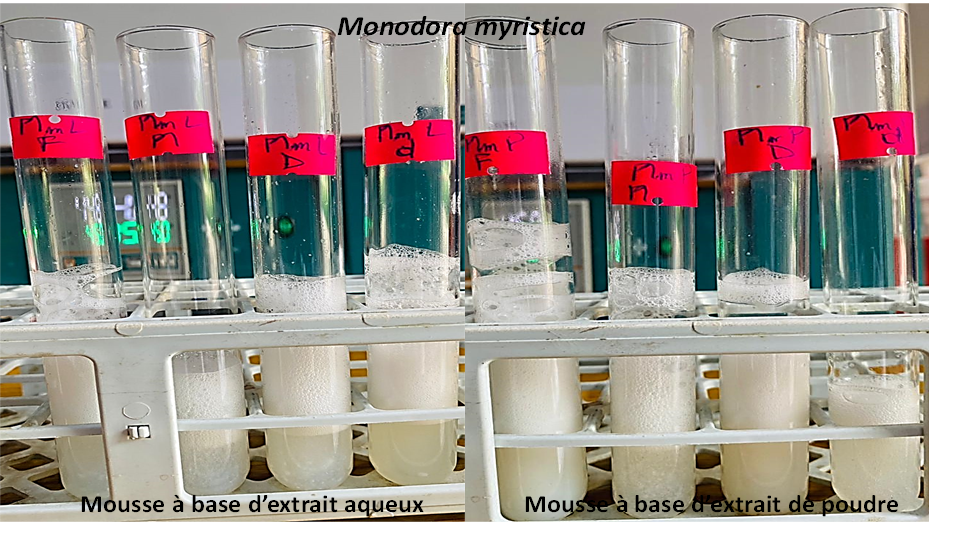


**Figure S11.**Foaming power of *Monodora myristica* soaps.


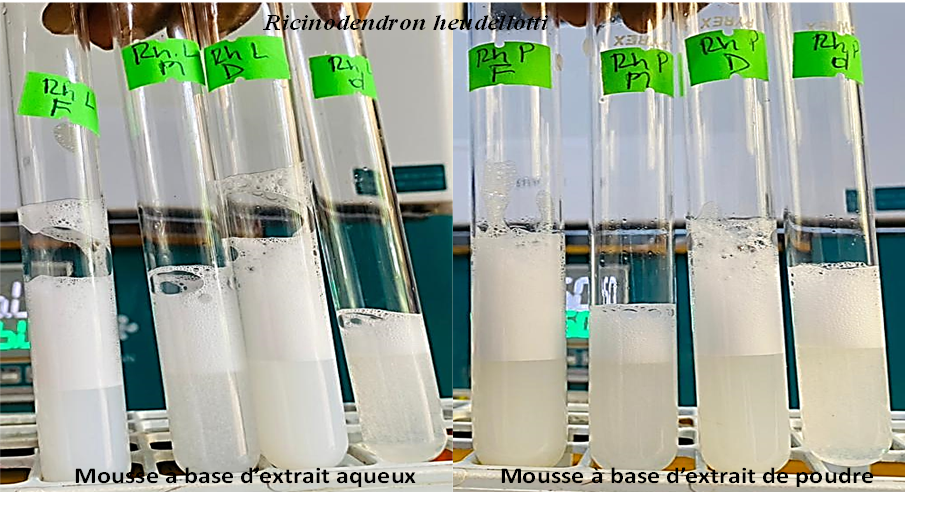


**Figure S12***.* Foaming power of *Ricinodendron heudelotii* soaps.
